# Supplementary material for: Balancing intelligence and intuition: a human-AI decision support model for strategic technology adoption in SMEs
Source: PeerJ journal article supplement (doi:10.7717/peerj-cs.3341), 2025-11-10
Supplement: 1_Before_preprocessing.xlsx [file 1_Before_preprocessing.xlsx]

## Sheet: Before preprocessing
	SME ID	Cloud Vendor	Monthly Cost (USD)	Deployment Time (weeks)	Performance Feedback (text)	Compliance Certs	Support Feedback (text)	Outcome (Success/Fail)
	SME01	Azure	$8,500	5	"Excellent speed, stable uptime"	GDPR, ISO27001	"24x7 chat support, very helpful"	Success
	SME02	AWS	$9,700	4	"Top-notch APIs, very fast"	GDPR, HIPAA	"Proactive ticket resolution"	Success
	SME03	GCP	$7,800	6	"Fast deployment, good performance"	GDPR	"Support took time but resolved"	Success
	SME04	Oracle	$8,300	7	"Average performance, some lags"	GDPR	"Support quality is okay"	Success
	SME05	IBM	$6,800	8	"Slower services, downtime issues"	None	"Hard to reach tech support"	Fail
	SME06	AWS	$9,300	4	"Fast, scalable, no downtime"	GDPR, ISO27001	"Superb tech support"	Success
	SME07	GCP	$8,000	6	"Works well, but lacks features"	GDPR	"Support average"	Success
	SME08	Azure	$9,200	5	"Excellent service and latency"	GDPR, HIPAA	"Fast resolution of issues"	Success
	SME09	Oracle	$7,500	7	"Meets needs, no major issues"	GDPR	"Good technical onboarding"	Success
	SME10	AWS	$10,200	3	"Super scalable, great uptime"	GDPR, ISO27001	"Great documentation"	Success
	SME11	IBM	$6,700	8	"Underperformed, inconsistent"	None	"Delayed replies from support"	Fail
	SME12	Azure	$8,900	5	"Reliable and consistent"	GDPR, ISO27001	"Always reachable"	Success
	SME13	GCP	$7,600	6	"Good overall, competitive pricing"	GDPR	"Responsive but technical depth low"	Success
	SME14	Oracle	$8,000	7	"Meets compliance, medium speed"	GDPR	"Support turnaround is slow"	Success
	SME15	AWS	$9,800	4	"Very fast, highly scalable"	GDPR, HIPAA	"Excellent dashboard and helpdesk"	Success
	SME16	IBM	$6,600	9	"Many bugs and issues"	None	"Unhelpful support"	Fail
	SME17	Azure	$9,000	5	"Seamless data migration"	GDPR, ISO27001	"Quick resolution of incidents"	Success
	SME18	GCP	$7,900	6	"Good value for money"	GDPR	"Prompt ticket closure"	Success
	SME19	Oracle	$8,100	6	"Fits needs but UI is clunky"	GDPR	"Onboarding was smooth"	Success
	SME20	AWS	$9,500	4	"Reliable and well-integrated"	GDPR, ISO27001	"Good tutorials and forums"	Success
