# Supplementary material for: Balancing intelligence and intuition: a human-AI decision support model for strategic technology adoption in SMEs
Source: PeerJ journal article supplement (doi:10.7717/peerj-cs.3341), 2025-11-10
Supplement: 2_after_pre_processing.xlsx [file 2_after_pre_processing.xlsx]

## Sheet: after pre processing
	SME ID	Vendor	Monthly Cost ($)	Performance (0–10)	Compliance (1=Yes, 0=No)	Support Rating (0–10)	Adoption Outcome
	SME01	Azure	8500	9.2	1	9	1
	SME02	AWS	9700	9.5	1	8.4	1
	SME03	GCP	7800	8.1	1	7.5	1
	SME04	Oracle	8300	7.2	1	7.1	1
	SME05	IBM	6800	6.9	0	6.2	0
	SME06	AWS	9300	9.1	1	8.7	1
	SME07	GCP	8000	7.9	1	7.2	1
	SME08	Azure	9200	9	1	9.2	1
	SME09	Oracle	7500	7.1	1	7	1
	SME10	AWS	10200	9.3	1	8.1	1
	SME11	IBM	6700	6.6	0	6	0
	SME12	Azure	8900	9.4	1	9.1	1
	SME13	GCP	7600	7.8	1	7.3	1
	SME14	Oracle	8000	7.3	1	7.4	1
	SME15	AWS	9800	9.2	1	8.6	1
	SME16	IBM	6600	6.5	0	6.1	0
	SME17	Azure	9000	9.1	1	8.9	1
	SME18	GCP	7900	8	1	7.4	1
	SME19	Oracle	8100	7	1	7.3	1
	SME20	AWS	9500	9.4	1	8.2	1
