# Supplementary material for: Balancing intelligence and intuition: a human-AI decision support model for strategic technology adoption in SMEs
Source: PeerJ journal article supplement (doi:10.7717/peerj-cs.3341), 2025-11-10
Supplement: 3_Human_Stakeholder_Profiles.xlsx [file 3_Human_Stakeholder_Profiles.xlsx]

## Sheet: Human Stakeholder Profiles and 
	Stakeholder_ID	Role	Priority Area	Preferred Cloud Vendor	Years of Experience	Region
	H1	CTO	Scalability	Oracle	18	North America
	H2	IT Manager	Compliance	Azure	15	Europe
	H3	Business Analyst	Cost-efficiency	AWS	12	Asia
	H4	Consultant	Security	Oracle	20	North America
	H5	Operations Head	Support	GCP	14	Australia
	H6	Digital Transformation Lead	Integration	IBM	22	Europe
	H7	CTO	Scalability	AWS	17	Asia
	H8	IT Manager	Compliance	Oracle	19	North America
	H9	Business Analyst	Cost-efficiency	Azure	16	Europe
	H10	Consultant	Security	GCP	13	Asia
	H11	Operations Head	Support	IBM	11	Australia
	H12	Digital Transformation Lead	Integration	AWS	10	South America
	H13	CTO	Scalability	Azure	20	Asia
	H14	IT Manager	Compliance	AWS	14	Europe
	H15	Business Analyst	Cost-efficiency	IBM	15	North America
	H16	Consultant	Security	Oracle	13	Europe
	H17	Operations Head	Support	GCP	21	Asia
	H18	Digital Transformation Lead	Integration	Azure	18	Australia
	H19	CTO	Scalability	IBM	19	North America
	H20	IT Manager	Compliance	GCP	16	Asia
	H21	Business Analyst	Cost-efficiency	AWS	14	Europe
	H22	Consultant	Security	Oracle	22	Australia
	H23	Operations Head	Support	Azure	13	Asia
	H24	Digital Transformation Lead	Integration	AWS	15	North America
	H25	CTO	Scalability	Oracle	17	Europe
