# Supplementary material for: Balancing intelligence and intuition: a human-AI decision support model for strategic technology adoption in SMEs
Source: PeerJ journal article supplement (doi:10.7717/peerj-cs.3341), 2025-11-10
Supplement: 4_SHTi_for_Each_Vendor.xlsx [file 4_SHTi_for_Each_Vendor.xlsx]

## Sheet: SH(Ti) for Each Vendor (Scale 
	Stakeholder_ID	AWS	Azure	GCP	Oracle	IBM
	H1	5.5	6	4.5	7.8	5
	H2	5.8	7.2	5	6.4	4.8
	H3	7.6	5.4	6.1	5	4.2
	H4	5.2	4.6	4.9	7.7	5.5
	H5	4.8	5	7.3	5.9	5.4
	H6	5	5.5	5.1	6	7.1
	H7	7.5	5.7	4.8	5.6	4.5
	H8	5.3	6.8	4.9	7.2	4.7
	H9	4.7	7.3	5.6	5.1	4.9
	H10	4.9	5.1	6.5	5.2	5.3
	H11	5.1	5	4.8	5.4	7
	H12	6.9	5.5	4.7	5	4.5
	H13	5.5	7.1	4.9	6.1	5
	H14	7	5.4	4.7	5.5	4.8
	H15	4.8	5.3	5	5.9	7.4
	H16	5.1	4.9	5.4	7.6	5
	H17	5	5.2	7.4	5.6	4.7
	H18	5.2	6.7	5.5	5.2	5
	H19	4.9	5.4	5	5.7	7.3
	H20	5.3	5.1	6.2	5	4.6
	H21	7.2	5	5.1	5.2	4.5
	H22	5.1	5.3	4.7	7.8	5.2
	H23	5	6.9	5	5.3	4.9
	H24	6.7	5.4	5.1	5	4.8
	H25	5	5.5	4.9	7.5	5
