# Supplementary material for: Balancing intelligence and intuition: a human-AI decision support model for strategic technology adoption in SMEs
Source: PeerJ journal article supplement (doi:10.7717/peerj-cs.3341), 2025-11-10
Supplement: 5_Stakeholders.xlsx [file 5_Stakeholders.xlsx]

## Sheet: Stakeholders
	Stakeholder ID	Role	Priority Area	Weight Assigned (%)	Cloud Vendor Preferences (Ranked)	Justifications / Notes
	H001	CTO	Data Integration & Security	0.4	1. Azure 2. AWS 3. GCP	Azure has native MS tool integration and strong security compliance.
	H002	IT Manager	Support & Operational Fit	0.35	1. AWS 2. Azure 3. IBM	AWS provides robust support; Azure is familiar but support is inconsistent.
	H003	Consultant	Strategic Alignment & Future Readiness	0.25	1. GCP 2. Azure 3. Oracle	GCP fits future analytics; Azure has a solid roadmap; Oracle is legacy-heavy.
	H004	Business Analyst	Cost Efficiency	0.3	1. AWS 2. GCP 3. Azure	AWS competitive pricing; GCP good discounts; Azure a bit expensive.
	H005	Operations Head	Scalability & Flexibility	0.35	1. Azure 2. AWS 3. IBM	Azure offers strong auto-scaling; AWS is flexible; IBM lacks some modern features.
	H006	Digital Transformation Lead	Innovation & Integration	0.4	1. IBM 2. Azure 3. AWS	IBM leads in hybrid cloud; Azure strong integration; AWS less hybrid-focused.
	H007	CTO	Security & Compliance	0.45	1. Oracle 2. Azure 3. AWS	Oracle strong compliance; Azure good GDPR support; AWS broader ecosystem.
	H008	IT Manager	Support & Documentation	0.3	1. AWS 2. IBM 3. Azure	AWS best docs; IBM good for enterprise; Azure less clear docs.
	H009	Consultant	Strategic Alignment & Risk	0.25	1. Oracle 2. GCP 3. Azure	Oracle reliable risk control; GCP future ready; Azure well supported.
	H010	Business Analyst	Cost Control & ROI	0.35	1. AWS 2. Azure 3. GCP	AWS best ROI historically; Azure competitive; GCP good for analytics.
	H011	Operations Head	Operational Efficiency	0.4	1. Azure 2. IBM 3. AWS	Azure optimized for operations; IBM strong in support; AWS broad services.
	H012	Digital Transformation Lead	Innovation & Automation	0.3	1. GCP 2. AWS 3. Azure	GCP strong AI tools; AWS broad automation; Azure growing fast.
	H013	CTO	Data Privacy & Security	0.45	1. Azure 2. Oracle 3. AWS	Azure excellent privacy controls; Oracle strong security; AWS widespread adoption.
	H014	IT Manager	Support & SLA	0.35	1. AWS 2. Azure 3. GCP	AWS best SLA; Azure improving; GCP competitive but less enterprise focus.
	H015	Consultant	Strategic Fit & Innovation	0.25	1. IBM 2. Oracle 3. Azure	IBM strong in hybrid; Oracle solid in enterprises; Azure innovating rapidly.
	H016	Business Analyst	Cost & Performance	0.4	1. AWS 2. GCP 3. Azure	AWS high performance; GCP efficient cost; Azure a bit higher priced.
	H017	Operations Head	Reliability & Uptime	0.35	1. Azure 2. AWS 3. IBM	Azure 99.99% uptime; AWS very reliable; IBM strong support.
	H018	Digital Transformation Lead	Integration & Ecosystem	0.4	1. Azure 2. AWS 3. GCP	Azure deep MS integration; AWS large ecosystem; GCP focused on cloud-native.
	H019	CTO	Security & Compliance	0.45	1. Oracle 2. Azure 3. IBM	Oracle compliance leader; Azure excellent security; IBM good hybrid compliance.
	H020	IT Manager	Support & Documentation	0.3	1. AWS 2. Azure 3. GCP	AWS thorough docs; Azure improving; GCP less mature in enterprise docs.
	H021	Consultant	Strategic Alignment	0.25	1. GCP 2. Oracle 3. Azure	GCP future-proof; Oracle enterprise ready; Azure balanced.
	H022	Business Analyst	Cost Efficiency & ROI	0.4	1. AWS 2. Azure 3. GCP	AWS competitive pricing; Azure good ROI; GCP analytics advantage.
	H023	Operations Head	Operational Fit & Support	0.35	1. Azure 2. IBM 3. AWS	Azure best support; IBM strong enterprise focus; AWS broad coverage.
	H024	Digital Transformation Lead	Innovation & Scalability	0.4	1. AWS 2. Azure 3. GCP	AWS leading innovation; Azure strong scalability; GCP cloud-native strength.
	H025	CTO	Security & Integration	0.45	1. Oracle 2. Azure 3. AWS	Oracle robust security; Azure good integration; AWS broad tools.
