# Supplementary material for: Balancing intelligence and intuition: a human-AI decision support model for strategic technology adoption in SMEs
Source: PeerJ journal article supplement (doi:10.7717/peerj-cs.3341), 2025-11-10
Supplement: 6_weights.xlsx [file 6_weights.xlsx]

## Sheet: weights S
Stakeholder Weights (in decimal)
	Stakeholder	Weight
	H001	0.06
	H002	0.055
	H003	0.05
	H004	0.045
	H005	0.04
	H006	0.04
	H007	0.035
	H008	0.035
	H009	0.03
	H010	0.03
	H011	0.025
	H012	0.025
	H013	0.025
	H014	0.02
	H015	0.02
	H016	0.018
	H017	0.017
	H018	0.016
	H019	0.016
	H020	0.015
	H021	0.015
	H022	0.014
	H023	0.013
	H024	0.013
	H025	0.012
