# Supplementary material for: Balancing intelligence and intuition: a human-AI decision support model for strategic technology adoption in SMEs
Source: PeerJ journal article supplement (doi:10.7717/peerj-cs.3341), 2025-11-10
Supplement: 7_SHTi.xlsx [file 7_SHTi.xlsx]

## Sheet: SH(Ti)
	Human Scores Table (0.4 to 1.0 scale)
	Vendor	H001	H002	H003	H004	H005	H006	H007	H008	H009	H010	H011	H012	H013	H014	H015	H016	H017	H018	H019	H020	H021	H022	H023	H024	H025	Weighted Average SH(Ti)
	Azure	0.93	0.87	0.82	0.85	0.88	0.9	0.84	0.83	0.79	0.77	0.75	0.8	0.82	0.81	0.78	0.8	0.83	0.82	0.79	0.77	0.76	0.75	0.74	0.72	0.7	0.816
	AWS	0.84	0.94	0.68	0.75	0.72	0.7	0.74	0.77	0.73	0.71	0.69	0.68	0.7	0.69	0.68	0.66	0.65	0.67	0.66	0.68	0.69	0.67	0.66	0.65	0.63	0.7
	GCP	0.78	0.62	0.88	0.7	0.75	0.73	0.72	0.71	0.69	0.7	0.72	0.73	0.74	0.7	0.68	0.69	0.66	0.67	0.66	0.65	0.63	0.64	0.62	0.61	0.6	0.682
	Oracle	0.67	0.59	0.63	0.6	0.58	0.62	0.61	0.63	0.6	0.59	0.57	0.56	0.55	0.54	0.55	0.56	0.57	0.58	0.56	0.54	0.53	0.52	0.51	0.5	0.49	0.567
	IBM	0.57	0.68	0.52	0.5	0.53	0.55	0.56	0.54	0.53	0.52	0.5	0.48	0.47	0.46	0.45	0.46	0.48	0.49	0.5	0.51	0.52	0.53	0.52	0.5	0.49	0.511
